## 1 **Melon ethylene-mediated transcriptome and methylome dynamics provide insights to** 2 **volatile production**

3  
4

5 Ari Feder<sup>1,2,6</sup>, Chen Jiao<sup>1,6</sup>, Navot Galpaz<sup>2,3</sup>, Julia Vrebalov<sup>1</sup>, Yimin Xu<sup>1</sup>, Vitaly Portnoy<sup>2</sup>, Galil Tzuri<sup>2</sup>,  
6 Itay Gonda<sup>2</sup>, Joseph Burger<sup>2</sup>, Amit Gur<sup>2</sup>, Yaakov Tadmor<sup>2</sup>, Arthur A. Schaffer<sup>4</sup>, Efraim Lewinsohn<sup>2</sup>,  
7 Nurit Katzir<sup>2</sup>, Zhangjun Fei<sup>1,5</sup>, James J. Giovannoni<sup>1,5\*</sup>

8 <sup>1</sup>Boyce Thompson Institute for Plant Research, Cornell University, Ithaca, NY, USA. <sup>2</sup>Newe Ya'ar  
9 Research Center, Agricultural Research Organization, Ramat Yishay, Israel. <sup>3</sup>Northern Agriculture R&D,  
10 Migal Galilee Technology Center, Kiryat Shmona, Israel. <sup>4</sup>Department of Vegetable and Field Crops,  
11 Volcani Center, Agricultural Research Organization, Rishon LeZion, Israel. <sup>5</sup>US Department of  
12 Agriculture–Agricultural Research Service, Robert W. Holley Center for Agriculture and Health, Ithaca,  
13 NY, USA. <sup>6</sup>These authors contributed equally. \*corresponding author: [jjg33@cornell.edu](mailto:jjg33@cornell.edu).

14  
15

### 16 **Abstract**

17 During climacteric ripening large-scale transcriptional modifications are governed by ethylene. While  
18 ripening-related chromatin modifications are also known to occur, a direct connection between these  
19 factors has not been demonstrated. We characterized ethylene-mediated transcriptome modification,  
20 genome methylation dynamics, and their relation to organoleptic modifications during fruit ripening in the  
21 climacteric melon and an ethylene repressed line where the fruit-specific *ACC oxidase 1 (ACO1)* gene  
22 was targeted by antisense. The *ACO1* antisense line exhibited mainly reduced transcriptional repression of  
23 ripening-related genes associated with DNA CHH hypomethylation at the onset of ripening. Additionally,  
24 transcription of a small set of ethylene-induced genes, including known ripening-associated genes, was  
25 inhibited by *ACO1* repression and this inhibition was associated with CG hypermethylation. In the *ACO1*  
26 antisense line, the accumulation of aromatic compounds, which are mainly derived from the catabolism of  
27 amino acids, is known to be inhibited. One of the ethylene-mediated transcriptionally up-regulated genes,  
28 *CmTHA1*, encoding a threonine aldolase, exhibited differential cytosine methylation. Threonine aldolase  
29 catalyzes the conversion of L-threonine/L-allo threonine to glycine and acetaldehyde and thus is likely  
30 involved in threonine-dependent ethyl ester biosynthesis. Yeast mutant complementation and incubation  
31 of melon discs with labeled threonine verified *CmTHA1* threonine aldolase activity, revealing an  
32 additional ethylene-dependent amino acid catabolism branch involved in climacteric melon ripening.

33

34

## 35 **Introduction**

36 Ethylene, widely known as the ripening hormone, underlines climacteric fruit ripening. Widely studied  
37 climacteric fruits include tomato and melon where following seed maturation ripening competence is  
38 achieved and a burst of autocatalytic ethylene orchestrates coordinated changes in fruit pigmentation,  
39 aroma, cell wall modifications and tissue softening (Giovannoni, 2004; Yano and Ezura, 2016). This  
40 transition is accompanied by reprogramming of expression of thousands of genes (Alba et al., 2005; Saladié  
41 et al., 2015; Shin et al., 2017; Yano et al., 2018). Fruit ethylene biosynthesis is dependent on the activity  
42 of multiple genes including transcription factors (TFs) and changes in histone-mediated repression of  
43 MADS-box and/or NAC domain TFs (Giovannoni et al., 2017; Rios et al., 2017; Lu et al., 2018). From a  
44 biochemical flux perspective autocatalytic ethylene involves transcriptional up-regulation of  
45 *cystathionine-γ-synthase* (*CGS*), the first committed step in synthesis of methionine, the amino acid  
46 precursor of ethylene (Alba et al., 2005). Much of our knowledge of climacteric fleshy fruit ripening  
47 derives from studies in tomato. Melon is also widely studied as it exhibits extreme genotypic and  
48 phenotypic variation including in climacterism (Burger et al., 2010; Gur et al., 2017; Galpaz et al., 2018).  
49 In contrast to tomato, fruit carotenoid accumulation is ethylene independent in melon and controlled by a  
50 ‘golden’ SNP in the *CmOr* gene (Tzuri et al., 2015). Introduction of a ‘golden’ SNP harboring allele into  
51 tomato significantly elevates fruit nutritional value through increased carotenoid accumulation (Yuan et  
52 al., 2015; Yazdani et al., 2019).

53 The *ACO1* antisense ethylene deficient mutant has proven an important tool in the study of climacteric  
54 melon fruit ripening (Ayub et al., 1996; Pech et al., 2008). In particular, *ACO1* antisense fruits fail to  
55 degrade chlorophyll and retain green rind color. The stay-green (SGR) phenotype is mediated by reduced  
56 activity of the ethylene-regulated SGR protein resulting in reduced chlorophyll degradation (Alba et al.,  
57 2005; Barry et al., 2008; Shimoda et al., 2016). *ACO1* antisense also results in greatly reduced fruit  
58 aromatic volatile compounds including acetate esters and ethyl esters (Homatidou et al., 1992; Bauchot et  
59 al., 1998; Flores et al., 2002). During melon ripening, aroma is largely attributed to ester biosynthesis  
60 involving the conversion of aldehydes into alcohols by alcohol dehydrogenases (ADHs) (Manríquez et  
61 al., 2006; Jin et al., 2016) followed by activity of alcohol acyltransferases (AATs) (Shalit et al., 2001; El-  
62 Yahyaoui et al., 2002; El-Sharkawy et al., 2005). Several amino acid metabolism pathways and associated  
63 ethylene-regulated genes underlying ester biosynthesis have been identified in melon. These include  
64 metabolism of branched-chain amino acids, methionine and phenylalanine (Wyllie et al., 1995; El-  
65 Yahyaoui et al., 2002; El-Sharkawy et al., 2005; Gonda et al., 2010; Gonda et al., 2018). Acetaldehyde is  
66 synthesized from pyruvate, the end product of glycolysis via pyruvate decarboxylase (PDC) (Tietel et al.,

67 2011). Recently CmPDC1, a ripening induced melon pyruvate decarboxylase has been shown to be  
68 involved in acetaldehyde biosynthesis and downstream ester accumulation (Wang et al., 2019).  
69 Acetaldehyde has been shown to be a limiting factor in ethanol and derived ester levels in feijoa and  
70 strawberry (Pesis and Avissar, 1990; Pesis et al., 1991). Similar observations were made in apple for  
71 different aldehydes (De Pooter et al., 1983). Goulao and Oliveira (2007) hypothesized that threonine  
72 aldolase activity might also serve as a limiting factor in acetaldehyde-derived volatile biosynthesis during  
73 apple ripening based on transcriptional up-regulation of a putative L-allo-threonine aldolase gene. Due to  
74 their contributions to fleshy fruit quality, there is growing interest in biosynthesis of aromatic compounds,  
75 though limited variance is observed in modern cultivars of some important species such as tomato  
76 (Tieman et al., 2017).

77 Recently fleshy fruit development has been shown to be dependent upon chromatin remodeling. For  
78 example, during early tomato fruit and floral development, *SIFIE* and *SIEZI*, members of the polycomb  
79 repressive 2 (PRC2) complex, play critical roles in fruit development as demonstrated by their repression  
80 (How Kit et al., 2010; Liu et al., 2012; Bucher et al., 2018). The PRC2 complex, which belongs to the  
81 polycomb group (PcG), catalyzes trimethylation of histone H3 lysine 27 (H3K27me3), negatively  
82 regulating gene expression (Holec and Berger, 2012). Additional regulators found in plants include  
83 histone variants. Histone H3.1 is enriched in silent genomic regions enriched with both H3K27me3 and  
84 DNA methylation, negatively correlating with gene expression; in contrast, H3.3 associates with actively  
85 transcribed genes in *Arabidopsis* (Stroud et al., 2012). DNA methyltransferase inhibition promotes  
86 premature ripening in tomato, suggesting an active remodeling mechanism prevents premature ripening  
87 through DNA methylation (Zhong et al., 2013). During tomato fruit ripening, *SIDML2*, a DEMETER-like  
88 DNA demethylase is transcriptionally up-regulated, and its repression or gene editing resulted in genome-  
89 wide hypermethylation, including in the promoters of ripening transcription factors resulting in inhibition  
90 of ethylene biosynthesis and ripening repression (Liu et al., 2015; Lang et al., 2017). Further genetic  
91 evidence of an active gene suppression mechanism during early fruit developmental stages was  
92 demonstrated through manipulation of the PRC2 member *SIMSII* (Liu et al., 2016).

93 DNA CHH methylation typical of heterochromatic transposable elements (TEs) is significantly increased  
94 in fruits. In addition CHH methylation exhibits dynamics during fruit development and is affected by  
95 ripening mutants and has been associated with gene expression changes (Zhong et al., 2013; Corem et al.,  
96 2018; Lu et al., 2018). An example of interaction among multiple chromatin remodeling components was  
97 demonstrated by a mutation in the rice CHH methyltransferase gene *OsDRM2*, resulting in the loss of  
98 H3K27me3 and de-repression of genes (Zhou et al., 2016). In contrast to chromatin regulation of the  
99 ripening transition and ethylene biosynthesis (Giovannoni et al., 2017; Lu et al., 2018), the downstream

100 involvement of chromatin dynamics in the ethylene response of climacteric fruits remains poorly  
101 understood.

102 To test whether there is a direct link between ethylene-regulated genes and chromatin dynamics we  
103 performed transcriptome and methylome comparisons of wild-type Védraçais (VED) and *ACO1*  
104 repressed melon fruit during early ripening and discovered ethylene-dependent methylome dynamics  
105 associated with ripening gene expression. A subset of this data suggested a role of threonine aldolase  
106 (CmTHA1) in melon ripening and fruit quality. Functional analysis confirmed that CmTHA1 plays a role  
107 in plant secondary metabolism, specifically production of volatile compounds integral to melon fruit  
108 quality.

109

## 110 **Results**

111 To determine the effect of ethylene on transcriptional regulation during melon fruit development, RNA-  
112 Seq transcriptome profiling was performed on mesocarp tissue at five stages: Half Size (HS), Full Size  
113 (FS), Onset of Ripening (OR), Early Climacteric (EC), and Full Climacteric (FC; Fig. 1A, Supplemental  
114 Tables S1-S3). Significant ethylene accumulation in VED was detected at the EC and FC stages, while  
115 the *ACO1* antisense line exhibited >99% reduction in ethylene evolution (Fig. 1B). The analysis  
116 confirmed abundant mRNA accumulation of *ACO1* in VED (*MELO3C014437*;  
117 <http://cucurbitgenomics.org/>), correlating with ethylene accumulation, while in the *ACO1* antisense line  
118 *ACO1* mRNA was dramatically reduced (Fig. 1C). Ethylene accumulation in VED at EC was  
119 accompanied by differential expression of 2,687 genes when compared to *ACO1* antisense (adjusted  
120  $p < 0.05$ , minimum 2-fold difference), of which 2,070 were up-regulated and 617 were down-regulated in  
121 *ACO1* compared to VED (Fig. 1D-E), indicating that the predominant ethylene effect during VED fruit  
122 ripening manifests as down-regulation of fruit gene expression.

### 123 **Dynamics of chromatin remodeling factors**

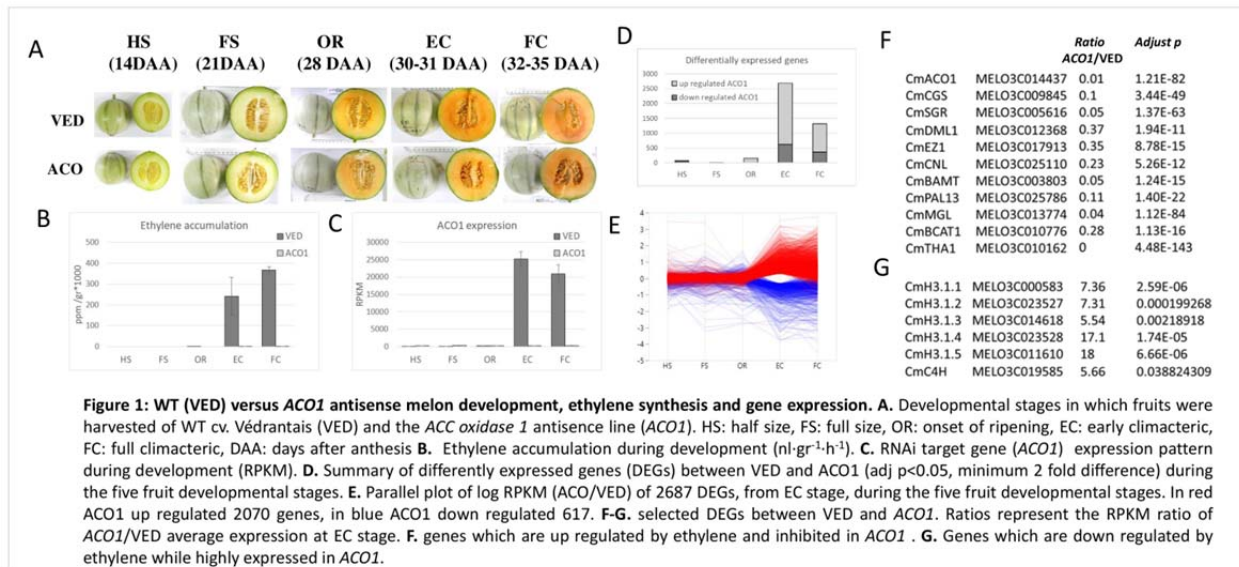

124 The role of DNA methylation in ethylene-mediated gene expression differences was of interest due to  
 125 recent reports regarding the role of DNA methylation and chromatin remodeling during fruit ripening  
 126 (Zhong et al., 2013; Liu et al., 2015; Lang et al., 2017; Lu et al., 2018). DNA bisulfite sequencing was  
 127 performed to determine cytosine (C) methylation in EC fruit from both genotypes (Supplemental Tables  
 128 S4-S6). Similar to previous reports in Arabidopsis (Zhang et al., 2006), hypermethylated sites in melon  
 129 were also found mainly in transposable element (TE)-rich heterochromatic regions (Fig. 2A). Total  
 130 cytosine methylation in the EC tissue of VED was 23%, while the *ACO1* mutant exhibited 4% less  
 131 genome-wide methylation (19%) in all cytosine context (Supplemental Table S6). This hypomethylation  
 132 included regions associated with coding sequences and again in all cytosine contexts, and generally  
 133 within a window spanning 2 kb up- and downstream of coding sequence (Fig. 2B-D). Methylome analysis  
 134 between VED and *ACO1* antisense EC fruit revealed 52,426 differentially methylated regions (DMRs) in  
 135 the CHH context and 9,866 in the CG context (Fig. 2A, Supplemental Table S7). 46.5% of the CHH and  
 136 38% of the CG DMRs were found to associate with gene regions defined as  $\pm 2$  kb from the ends of  
 137 coding sequences. Total methylation of gene-associated DMRs was decreased by 27% in the *ACO1*  
 138 antisense line compared to VED (calculated by the sum of average methylation in each site multiplied by  
 139 total DMR length), Suggesting ethylene regulates active CHH methylation leading to transcriptional  
 140 repression. Of the 2,687 DEGs at the EC stage between VED and *ACO1* antisense, 1,988 (74%) were  
 141 associated with DMRs (Supplemental Table S7). We noted a general tendency toward hypomethylation of  
 142 genes not repressed by ethylene in *ACO1* antisense fruit (Fig. 2E-F), most prevalently in the CHH  
 143 context.

144 Although most of the genes in this study consist of up-regulated DEGs (as compared to VED)  
 145 associated with hypomethylated DMRs in the EC tissue of *ACO1* antisense in the CG or CHH context, 30

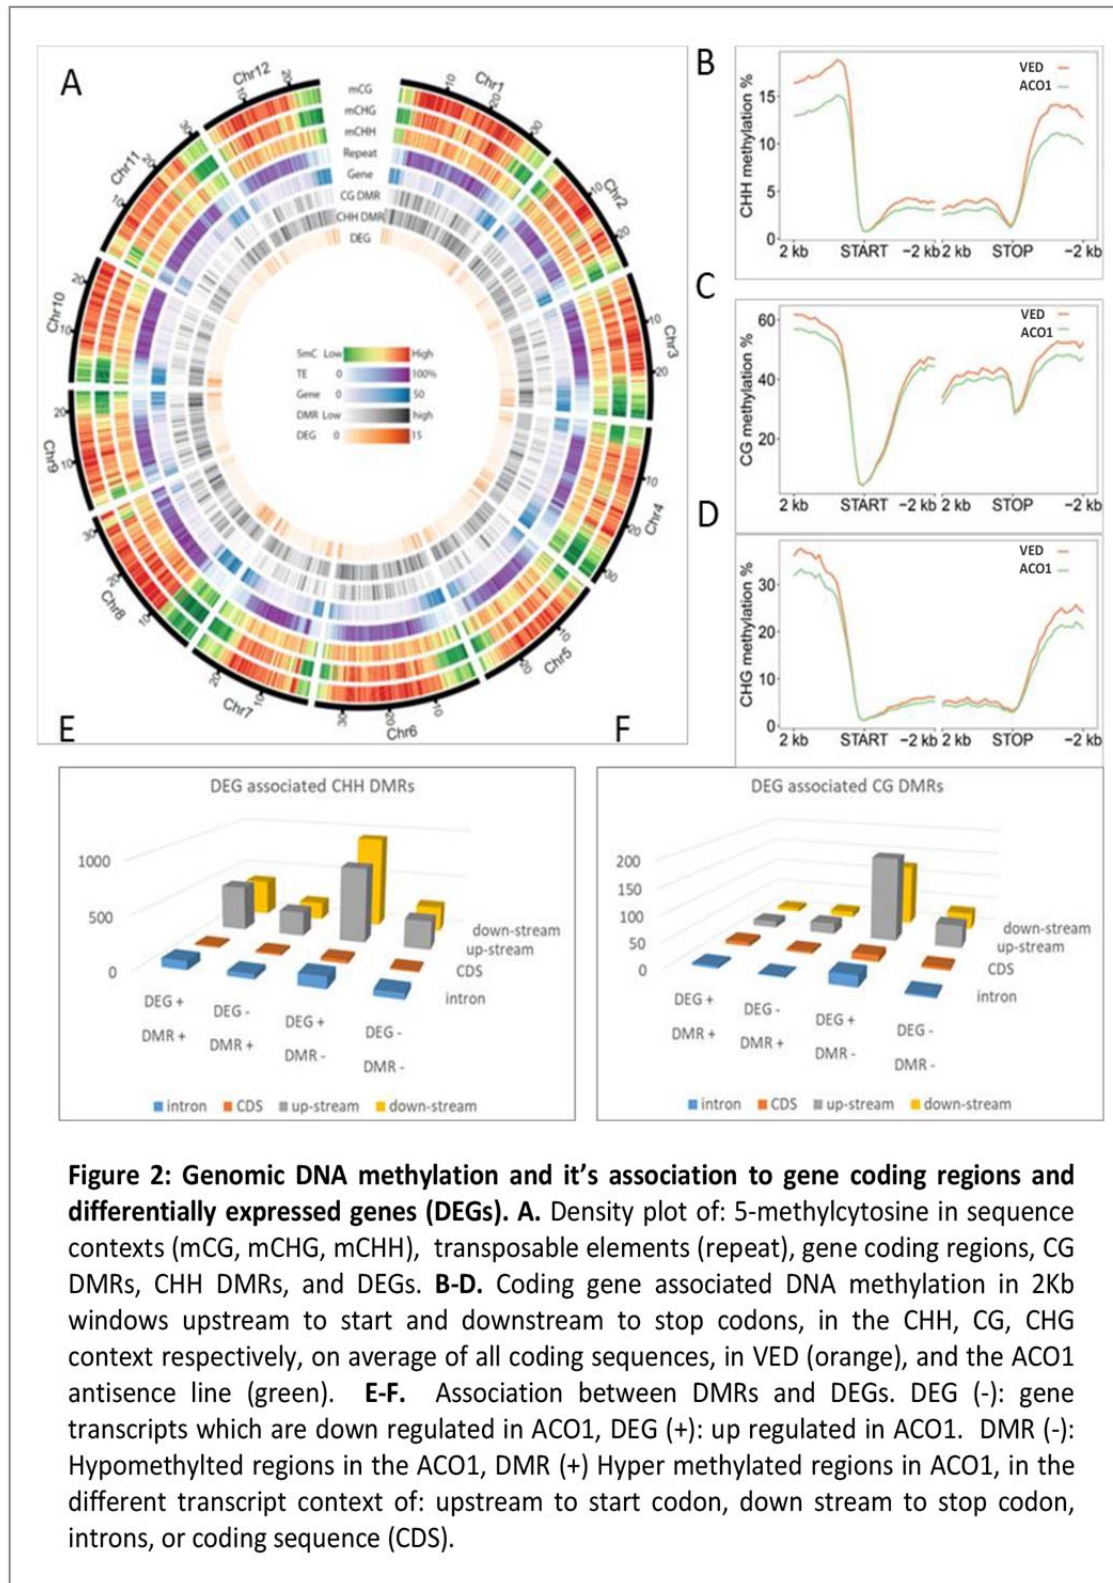

146 DEGs did show CG hypermethylation associated with transcriptional down-regulation in the *ACO1*

147 antisense. These genes include: *CmSGR* (*MELO3C005616*), *CmCGS* (*MELO3C009845*), and *CmEZI*  
148 (*MELO3C017913*), the ortholog of tomato *SIEZI* involved in H3K27me3-mediated gene silencing (Table  
149 S8; How kit et al 2010) and could be targets of DNA demethylase activity. *SIDML2*-dependent  
150 hypomethylation is the main mechanism underlying DNA methylation dynamics during fruit ripening  
151 characterized to date in tomato (Liu et al., 2015; Lang et al., 2017). Melon climacteric ripening is also  
152 associated with increased expression of a DNA glycosylase/demethylase, *CmDML1* whose expression is  
153 reduced to 37% of WT with *ACO1* repression (*MELO3C012368.2*, Fig. 1F, Supplemental Fig. S1).  
154 Unlike the tomato ripening-upregulated *SIDML2* gene which is an ortholog of Arabidopsis *REPRESSOR*  
155 *OF SILENCING1* (*ROS1*), *CmDML1* is the ortholog of Arabidopsis *DEMETER* (*DME*) (Zemach et al.,  
156 2010; Zhong et al., 2013). It is especially noteworthy that loss of *AtDME* function can occur with some  
157 loci still becoming hypomethylated, likely due to RNAi-mediated DNA methylation dynamics (Hsieh et  
158 al., 2009; Zemach et al., 2010). As such, while decreased *ACO1* genome methylation is not consistent  
159 with the observed reduction of *CmDML1* expression in the antisense line, alternative  
160 methylation/demethylation mechanisms likely contribute to maintaining relative hypomethylation in the  
161 absence of ethylene. Likely candidate genes contributing to this phenomena (e.g methyltransferases)  
162 were not revealed by our transcriptome analysis but the reduction in *CmCGS* necessary for downstream  
163 S-adenosyl-methionine (SAM) production (the methyl donor for DNA methylation) may provide a  
164 general mechanism for reduced methylation in *ACO1* antisense fruit.

165 Ethylene also influences histone variant transcriptional dynamics which could further influence gene  
166 expression. All five H3.1 histone variants found in melon (*MELO3C000583*, *MELO3C023527*,  
167 *MELO3C014618*, *MELO3C023528*, and *MELO3C011610*, Fig. S2) displayed ethylene-dependent down-  
168 regulation in VED, which is arrested in *ACO1* antisense fruit, resulting in a 5-18 fold expression increase  
169 in their relative mRNA abundances in the *ACO1* antisense line as compared to VED (Fig. 1G). The  
170 increased abundance of H3.1 histones which are generally associated with gene silencing could also be  
171 responsible for reduced expression of some genes repressed in *ACO1* ethylene reduced fruit.

## 172 **Genetic regulation of aromatic compound accumulation**

173 Volatiles are a significant component of consumer appreciation of ripe fruit (Gonda et al., 2016). Amino  
174 acid catabolism results in the production of a wide array of volatiles in melon. L-phenylalanine derived  
175 volatiles represent an important group of melon volatiles, and key pathway genes are both regulated by  
176 ethylene and have associated DMRs revealed in this study. For example, *CmCNL* (*MELO3C025110*)  
177 encoding an (E)-cinnamic acid:coenzyme A ligase involved in (E)-cinnamaldehyde biosynthesis, and  
178 *CmBAMT* (*MELO3C003803*) encoding a benzoic acid:S-adenosyl-L-methionine carboxyl  
179 methyltransferase involved in methyl benzoate biosynthesis (Gonda et al., 2018), exhibited strong



180 ethylene-dependent up-regulation (Fig. 1F) in addition to DMRs in both the CG and CHH contexts  
181 associated with *CmBAMT* (Supplemental Table S7). Two additional genes, *phenylalanine ammonia-lyase*  
182 *13* (*CmPAL13*, *MELO3C025786*) and *cinnamate 4-hydroxylase 1* (*CmC4H1*, *MELO3C019585*),  
183 previously suggested to be involved in melon rind phenylpropanoid synthesis (Feder et al., 2015), were  
184 also regulated by ethylene. *CmPAL13* was up-regulated by ethylene, while *CmC4H1* mRNA was down-  
185 regulated (Figs. 1F,G), suggesting the involvement of these genes in ethylene-mediated metabolic  
186 alternations resulting in channeling flux toward cinnamic acid and downstream volatiles in the maturing  
187 fruit. *CmC4H1* associated with a CHH DMR, while *CmPAL13* associated with DMRs in both the CHH  
188 and CG contexts (Supplemental Table S7). L-methionine-derived volatiles are dependent upon the *L-*  
189 *methionine- $\gamma$ -lyase* (*CmMGL*, *MELO3C013774*), which is involved in ethyl ester biosynthesis through  
190 L-isoleucine (Gonda et al., 2013). In addition, branched-chain amino catabolism in melon derive from  $\alpha$ -  
191 keto acids of L-isoleucine, L-leucine and L-valine, through the activity of the enzyme encoded by  
192 *CmBCAT1* (*MELO3C010776*), a branched-chain amino acid transaminase which is highly expressed in  
193 climacteric ripening melon fruits (Gonda et al., 2010). These two genes, *CmMGL* and *CmBCAT1*, also  
194 exhibited strong ethylene-dependent transcriptional up-regulation during VED fruit ripening (Fig. 1F) and  
195 a CHH DMR is associated with *CmMGL* expression changes (Supplemental Table S7).

#### 196 **Functional validation of *CmTHAI*'s role in melon fruit volatile synthesis**

197 L-threonine contributes to volatile biosynthesis via L-isoleucine, which is catabolized into esters (Gonda  
198 et al., 2013). Here we show that ethylene regulates *CmTHAI* (*MELO3C010162*, Fig. 1F), which encodes  
199 a putative L-allo threonine aldolase. *CmTHAI* associated with four DMRs in both the CHH and CG  
200 contexts (Supplemental Table S7). The melon genome harbors two homologs to this gene, *CmTHA2*  
201 (*MELO3C017520*) and *CmTHA3* (*MELO3C004421*). *CmTHAI* displayed the greatest mRNA  
202 accumulation in EC fruit of VED and was the only one significantly affected by ethylene, suggesting its  
203 involvement in ripening (Supplemental Fig. S3). Functional assessment of *CmTHAI* was performed via  
204 yeast complementation in a similar manner as previously described (Jander et al., 2004), using  $\Delta gly1$ , a  
205 yeast deletion mutant in strain BY4741 (Giaever et al., 2002). Gly1 is a low specificity threonine aldolase  
206 catalyzing the cleavage of both L-threonine and L-allo-threonine to glycine (Liu et al., 1997).  $\Delta gly1$  was  
207 transformed independently with vector pESC-URA ( $\Delta gly1$ -URA) and with the same vector harboring  
208 *CmTHAI* coding sequence under the galactose inducible Gal1 promoter ( $\Delta gly1$ -URA-*CmTHA*).  
209 Transformed strains were verified by PCR (Fig. 3A). Confirmed strains were grown on yeast extract-  
210 peptone-dextrose (YPD) control medium (Fig. 3B) along with different dropout media. Growth upon  
211 uracil dropout medium verified the ability of the pESC-URA vector to facilitate recovery from uracil  
212 auxotrophy (Fig. 3C). Glycine dropout medium supplemented with glucose verified that  $\Delta gly1$  is indeed a

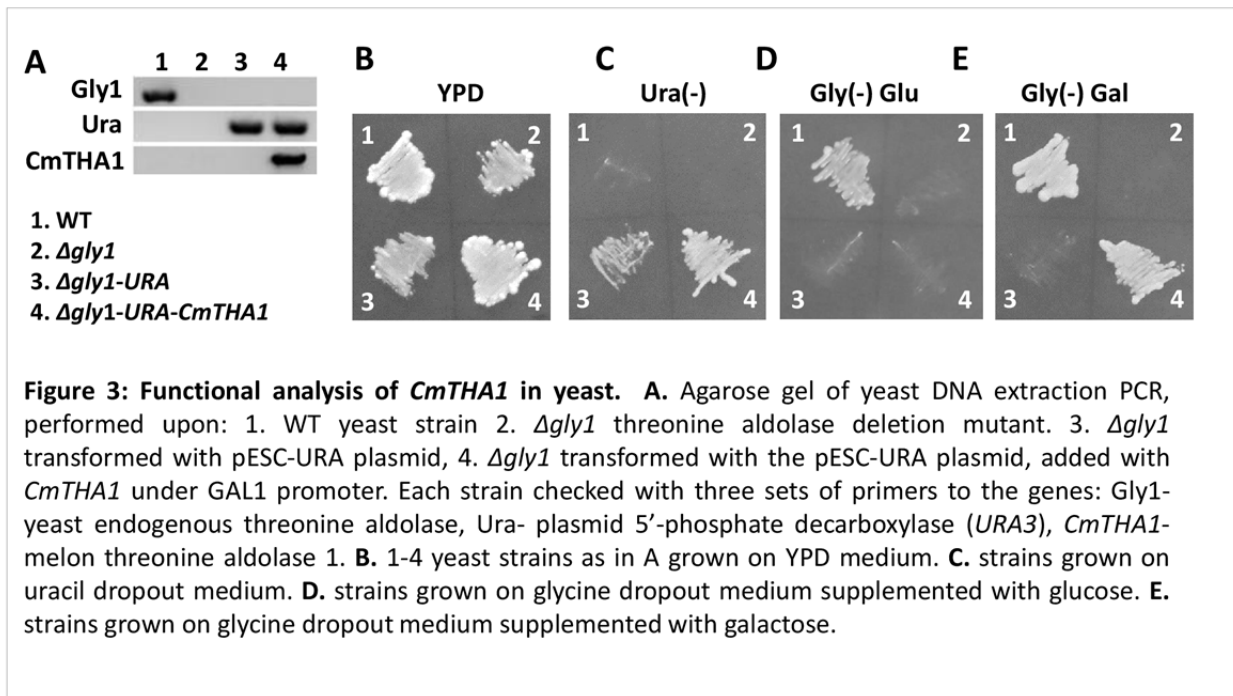

213 glycine auxotroph as well as the two  $\Delta gly1$ -URA and  $\Delta gly1$ -URA-CmTHA transformants (Fig. 3D).  
214 Changing glucose to galactose, allowing Gal1 promoter activation, confirmed that CmTHA1 could relieve  
215  $\Delta gly1$  glycine auxotrophy (Fig. 3E), indicating that CmTHA1 harbors THA activity.

216 To test the threonine aldolase catalytic activity in melon, fruit disks were incubated with  $^{13}\text{C}_4,^{15}\text{N}$ -L-  
217 threonine, followed by GC-MS analysis. Two types of labeling were detected. The +2m/z labeling was  
218 detected in acetaldehyde, confirming aldolase activity. Similar +2 m/z labeling was also detected in  
219 ethanol, and the ethyl esters (ethyl acetate, ethyl butanoate, ethyl (methylthio) acetate, ethyl 2-  
220 methylbutyrate, and ethyl propanoate) (Fig. 4). In addition, stronger +3 m/z labeling was observed for  
221 ethyl 2-methylbutyrate and ethyl propanoate, both of which were previously observed to be labeled  
222 similarly after incubation with  $^{13}\text{C}_6$ -L-isoleucine and positioned in the aldehyde derived moiety (Fig. 4C-  
223 D) (Gonda et al., 2013). Relatively low labeling of the +2 m/z fraction was anticipated to occur due to  
224 higher affinity of CmTHA1 to L-allo threonine and/or availability of acetaldehyde biosynthesized from  
225 pyruvate. The ester +2 m/z labeling position by the mass fragments of ethyl propanoate is a clear  
226 indication of its derivation from ethanol (Fig. 4E-F).

227

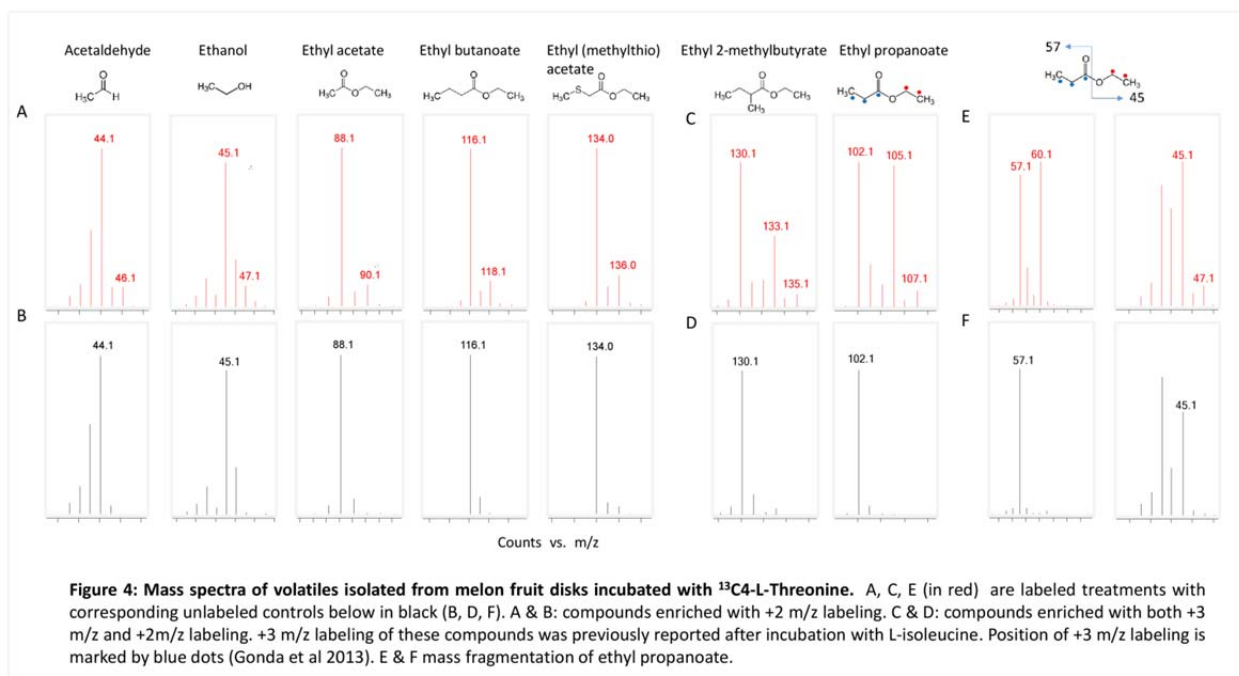

## 228 Discussion

### 229 Climacteric melon ripening transcriptome activity shifts toward down-regulation of gene 230 expression via increased gene methylation.

231 Changes in DNA methylation have been implicated in ripening control in tomato (Zhong et al., 2013), a  
232 climacteric fruit whose ripening is dependent upon ethylene. In general tomato ripening occurs in the  
233 context of demethylation of ripening gene promoters at regions at or adjacent to transcription factor  
234 binding sites. The role of ethylene in genome methylation changes has not been specifically examined in  
235 prior studies. Here we show the effect of ethylene upon DNA methylation through examination of  
236 climacteric (VED) and non-climacteric melon where the latter is achieved via antisense repression of the  
237 ethylene synthesis gene *ACO1* (Ayub et al., 1996). Chromatin remodeling factor genes are among those  
238 responding to ethylene in this system, suggesting a role for ethylene-mediated histone changes during  
239 melon ripening (Fig. 1G). Chromatin methylation during ripening in VED was also recently reported at  
240 rates of 75%, 63% and 91% hypomethylation in the CG, CHG and CHH contexts, respectively, in DMRs  
241 during the VED transition from unripe to ripe (Lu et al., 2018). The same report analyzed two non-  
242 climacteric varieties that trended toward hypermethylation of DMRs in the CHH context during the  
243 immature and unripe to fully ripe transition. It is important to note that Lu et al. (2018) specifically  
244 compared unripe (20 DAA) and ripe (40 DAA) VED fruit, spanning a developmental transition  
245 encompassing both ethylene-dependent and independent physiological and biochemical changes. The  
246 long duration between compared stages precluded any direct correlation with the climacteric or ripening  
247 ethylene induction in VED. Changes in sugars, carotenoids, organic acids and part of cell wall

248 metabolism all occur in this period and are known to be ethylene independent in melon (Ayub et al.,  
249 1996; Pech et al., 2008), and their relationship to chromatin dynamics remain unclear. Neither has any  
250 direct relationship between the plant hormone ethylene and methylome changes been established even  
251 though ethylene is a likely candidate for mediating such ripening-related changes in climacteric fruit.  
252 Here we characterized methylome changes in identically aged fruit at the early ripening stage, EC (30-31  
253 DAA) in WT and ethylene repressed fruit to address whether ethylene is involved in the methylation  
254 dynamics of ripening genes. We observed that ethylene-mediated methylome changes are substantial and  
255 the main effect on DNA methylation associated with ethylene in WT climacteric melon fruit ripening is  
256 hypermethylation.

257 Ethylene mainly caused down-regulation of genes which are also associated with CHH hypermethylation  
258 in WT (Fig. 1D). In addition, 30 WT ethylene induced genes are associated with CG hypomethylation,  
259 suggesting possible DNA demethylase involvement. This possibility was supported by the observation of  
260 ethylene-dependent up-regulation of *CmDML1* (Fig.1F), the orthologue of Arabidopsis *DME*. Tomato  
261 ripening occurs with transcriptional up-regulation of a DNA demethylase, *SIDML2*, the orthologue of  
262 Arabidopsis *ROS1*. This observation is not necessarily surprising in the context of recently reported  
263 evidence of convergent evolution of different regulatory targets in the evolution of fruit ripening (Lu et  
264 al., 2018). AtDME functions in the CG hypomethylation-dependent activation of gene expression (Hsieh  
265 et al., 2009). We show ethylene-dependent transcriptional up-regulation of *CmDME1* associated with a  
266 corresponding decrease in CG methylation and transcriptional up-regulation of *CmSGR*, *CmCGS*, and  
267 *CmEZ1*, suggesting that these genes are possible CmDME1 targets.

268 Further investigation into possible DNA methylation regulators based on melon fruit gene expression  
269 changes suggests possible CmCGS involvement. In tomato, ethylene-regulated transcriptional up-  
270 regulation of *cystathionine-γ-synthase* (*CGS*), the first committed step in methionine biosynthesis,  
271 controls the biochemical flux toward ethylene and is part of the ethylene autocatalytic mechanism (Alba  
272 et al., 2005). From methionine, ethylene is synthesized through S-adenosyl-L-methionine (SAM) which  
273 also serves as the main methyl donor for cytosine methylation catalyzed by DNA methyltransferases.  
274 Disruption of this pathway, including at SAM biosynthesis in Arabidopsis, results in genome  
275 hypomethylation leading to de-repression of TEs and activation of gene expression (Rocha et al., 2005;  
276 Groth et al., 2016; Meng et al., 2018; Yan et al., 2019). We demonstrate CmCGS also shows ethylene-  
277 dependent transcriptional up-regulation (Fig. 1F), and as such that *CGS*-dependent autocatalytic ethylene  
278 is conserved between tomato and melon. As an ethylene synthesis biochemical flux regulator, CmCGS is  
279 a limiting factor in SAM biosynthesis, consistent with the decreased capability of *ACO1* antisense to

280 down-regulate gene expression (Fig. 1D-E) through cytosine methylation (Fig. 2) due to limited  
281 availability of the necessary methyl donor.

282 In Arabidopsis, H3.1 histone variants were shown to associate with silent areas of the genome (Stroud et  
283 al., 2012). The ethylene-dependent transcriptional down-regulation of all melon H3.1 variants (Fig. 1G,  
284 Supplemental Fig. S3) suggests the ethylene-dependent transcription activation (Fig. 1D) is additionally  
285 mediated at least in part by down-regulation of H3.1 histone variants.

## 286 **CmTHA1 contributes to melon fruit volatile production**

287 Ethylene is known to regulate different amino acid catabolism pathways involved in fruit aroma  
288 including: L-methionine (via CmMGL), branched-chain amino acids (via CmBCAT1) and L-  
289 phenylalanine (via CmBAMT, CmCNL). In addition, responsiveness of *CmPAL13* and *CmC4H1* to  
290 ethylene suggested additional upstream flux channeling that may influence levels of these amino acids  
291 and their volatile metabolic products (Fig.1 F-G).

292 While the final steps in volatile ester biosynthesis involving AHD and AAT are largely understood,  
293 earlier steps in aldehyde formation remain uncertain. Recently CmPDC1 was found to mediate  
294 acetaldehyde biosynthesis in ripening melon fruit though additional factors are certainly involved (Wang  
295 et al., 2019). We demonstrate here that one such factor is CmTHA1 as demonstrated by +2 m/z labeling  
296 of acetaldehyde originating from threonine (Fig. 4). The resulting +2 m/z labeled compounds follow the  
297 general paradigm of ester biosynthesis in which acetaldehyde is converted to ethanol by ADH and  
298 subsequent AAT-dependent incorporation into ethyl esters (ethyl acetate, ethyl butanoate, ethyl  
299 (methylthio) acetate, ethyl 2-methylbutyrate, and ethyl propanoate).

## 300 **Summary**

301 We investigated basic chromatin remodeling at the level of DNA cytosine methylation specifically as  
302 influenced by ethylene during fruit ripening through comparison of early ripening WT climacteric (VED)  
303 and ethylene repressed transgenic (*ACO1* antisense) melon fruit. It is well known that modern cantaloupe  
304 melon varieties produce reduced aromatic compounds as a consequence of breeding efforts focused on  
305 increased shelf life through limiting ethylene biosynthesis and/or perception (Aubert and Bourger, 2004;  
306 Obando-Ulloa et al., 2008). We demonstrate that melon fruit severely limited in ripening ethylene  
307 production have substantially altered gene expression at the initial ripening stage and that many genes  
308 altered in expression are associated with DMRs, the majority of which are associated with  
309 hypomethylation in ethylene-repressed fruit and elevated gene expression as compared to WT. A smaller  
310 subset of genes show elevated expression with lower methylated DMRs in WT, a phenomena also

311 reported in tomato (Lang et al., 2017). As ethylene is known to be important in melon volatile synthesis  
312 we focused efforts on characterization of ethylene and DMR-associated genes contributing to volatile  
313 synthesis. We identified and demonstrated the function of CmTHA1, a previously uncharacterized L-allo  
314 threonine aldolase contributing to volatile ester synthesis. The more comprehensive picture of ethylene  
315 effects on gene expression resulting from this study should prove helpful in designing breeding strategies  
316 focused on ethylene-regulated ripening components such as volatile synthesis to target and reverse the  
317 negative effect of ethylene reduction on aroma.

318

319

## 320 **Materials and methods**

### 321 **Plant material and ethylene measurements**

322 Seeds of the *ACO1* antisense line (Ayub et al., 1996), along with Védraçais (VED) were kindly provided  
323 by Maria-Carmen Gomez-Jimenez, Plant Physiology department, University of Extremadura, Spain.  
324 Plants were grown in a randomized design in pots inside a greenhouse under standard conditions during  
325 spring 2013 at Newe Ya'ar Research Center. Flowers were tagged at anthesis. Fruits were collected  
326 during development according to Table S1. Ethylene emission was measured as previously described  
327 (Galpaz et al., 2018).

### 328 **RNA-Seq library preparation, sequencing and data analysis**

329 RNA extraction, library preparation and sequencing were performed according to the methods described  
330 previously (Zhong et al., 2011; Feder et al., 2015). Two to four biological replicates were performed for  
331 each sample. Raw RNA-Seq reads were processed using Trimmomatic (Bolger et al., 2014) v0.36 to  
332 remove adaptor and low-quality sequences. The cleaned reads were then aligned to the ribosomal RNA  
333 database (<https://www.arb-silva.de/>) with bowtie (Langmead, 2010) v1.0.0 (parameter '-v 3') to filter out  
334 rRNA reads. The final cleaned reads were aligned to the melon genome v3.5.1 (Diaz et al., 2015) using  
335 HISAT (Kim et al., 2015) allowing up to two mismatches. Raw counts for each gene were then derived  
336 from the alignments and normalized to reads per kilobase of transcript, per million mapped reads  
337 (RPKM). Differentially expressed genes between WT climacteric (VED) and ethylene repressed  
338 transgenic (*ACO1* antisense) melon fruit at each of the five developmental stages, half size (HS), full size  
339 (FS), onset of ripening (OR), early climacteric (EC), and full climacteric (FC), were identified with the  
340 DESeq2 package (Love et al., 2014). Genes with adjusted *P* value <0.05 and fold-change  $\geq 2$  were defined  
341 as differentially expressed genes.

### 342 **Whole-genome bisulfite sequencing and data analysis**

343 DNA for bisulfite sequencing was extracted from isolated nuclei following Zhong et al. (2013). Bisulfite  
344 library construction and sequencing were performed at the Roy J. Carver Biotechnology Center,  
345 University of Illinois, Urbana-Champaign. Raw bisulfite sequencing reads were first processed to collapse  
346 duplicated read pairs into unique read pairs. The resulting reads were then processed to remove adaptor  
347 and low-quality sequences using Trimmomatic v0.36. Two biological replicates were combined for the  
348 downstream analysis to obtain a better coverage of the genome. The method for the whole genome  
349 methylation analysis was same as described previously (Zhong et al., 2013). Briefly, before alignment,  
350 each base cytosine in the reads and the double-strand genome (G in reverse strand) was replaced with  
351 thymine (or A if reverse strand in the genome). The converted reads were aligned respectively to the two  
352 converted strands of the genome using bowtie allowing up to two mismatches, and reads aligned to  
353 multiple locations were excluded from the analysis. Alignments from the two strands were combined and  
354 the original read sequences in the alignments were recovered. Finally, methylation status of each cytosine  
355 in the melon genome was calculated on the basis of the alignments. A sliding-window approach with a  
356 100-bp window sliding at 50-bp intervals was used to identify context-specific DMRs. Windows with  
357 fewer than 5, 4 and 20 sequenced cytosine sites ( $\geq 4\times$  coverage) in the CG, CHG and CHH contexts,  
358 respectively, were discarded. For each window, a Kruskal–Wallis test was performed, and the *P* values  
359 were corrected using Benjamini-Hochberg method (Benjamini and Hochberg, 1995). Windows with  
360 corrected *P* value  $< 0.05$  were identified as DMRs and overlapping DMRs were concatenated.

### 361 **Yeast transformation**

362 *Δgly1* yeast obtained from the knockout library in the BY4741 background (Giaever et al., 2002), along  
363 with pESC-URA, were kindly provided by Maya Schuldiner's lab at Weizmann Institute of Science.  
364 Coding sequence of *CmTHA1* was obtained from cDNA of ripe fruit of Charentais melon, following PCR  
365 with the *THA1*-F/R primers. pESC-URA was linearized using *Sma*I/*Hind*III restriction enzymes,  
366 following insertion of the PCR product with NEBuilder (New England BioLabs). Growing media,  
367 including custom made Kaiser synthetic complete Gly(-) dropout, were obtained by Formedium. Primer  
368 sequences used in this study are listed in Supplemental Table S9.

### 369 **Labeled L-threonine feeding and CG-MS analysis**

370 Plants were grown in winter 2019 in greenhouse at Newe Ya'ar. Ripe fruits were collected, left at room  
371 temperature for 48h. Fruit mesocarp discs (approximately 1g each) were incubated with 100mM L-  
372 threonine-<sup>13</sup>C<sub>4</sub>, <sup>15</sup>N (Sigma) for 12 hours, after which tissue was frozen in liquid nitrogen and ground.  
373 Sample preparation for GC-MS was performed according to Gonda et al 2013. Data analysis was  
374 performed with the MassHunter software (Agilent).

375

376 **Accession numbers**

377

378 **Acknowledgments**

379 We thank Eric Richards for the insightful discussions. This research was supported The United States-  
380 Israel Binational Agricultural Research and Development Fund, Grant Award No. 3012114 (ICOB  
381 program) from the NSF-BSF Joint Funding Program, National Science Foundation Plant Genome  
382 Program grant No. 1339287 and the USDA-ARS.

383

384 **Conflict of interest**

385 The authors declare no conflict of interest.

386

387 **Supporting information**

388 Additional Supporting Information may be found in the online version of this article.

389

390 **Supplemental Figure S1.** Phylogenetic tree of the DML glycosylase gene family.

391 **Supplemental Figure S2.** Phylogenetic tree of H3.1 and H3.3 histone variants.

392 **Supplemental Figure S3.** Melon threonine aldolase fruit gene expression.

393 **Supplemental Table S1.** Fruit sampling, measurements, RNA-Seq preparation and statistics.

394 **Supplemental Table S2.** RNA-Seq sample correlation.

395 **Supplemental Table S3.** RNA-Seq gene expression (RPKM).

396 **Supplemental Table S4.** DNA bisulfite sequencing statistics.

397 **Supplemental Table S5.** DNA bisulfite coverage percentage.

398 **Supplemental Table S6.** DNA methylation percentage.

399 **Supplemental Table S7.** Differentially methylated regions associated with protein-coding genes.

400 **Supplemental Table S8.** Putative CmDML1 targets.

401 **Supplemental Table S9.** Primers used in this study.

402

403





## Parsed Citations

**Alba R, Payton P, Fei Z, McQuinn R, Debbie P, Martin GB, Tanksley SD, Giovannoni JJ (2005) Transcriptome and selected metabolite analyses reveal multiple points of ethylene control during tomato fruit development. *Plant Cell* 17: 2954-2965**

Pubmed: [Author and Title](#)

Google Scholar: [Author Only Title Only Author and Title](#)

**Aubert C, Bourger N (2004) Investigation of Volatiles in Charentais Cantaloupe Melons (*Cucumis melo* Var. *cantalupensis*). Characterization of Aroma Constituents in Some Cultivars. *Journal of Agricultural and Food Chemistry* 52: 4522-4528**

Pubmed: [Author and Title](#)

Google Scholar: [Author Only Title Only Author and Title](#)

**Ayub R, Guis M, Amor MB, Gillot L, Roustan J-P, Latché A, Bouzayen M, Pech J-C (1996) Expression of ACC oxidase antisense gene inhibits ripening of cantaloupe melon fruits. *Nature Biotechnology* 14: 862-866**

Pubmed: [Author and Title](#)

Google Scholar: [Author Only Title Only Author and Title](#)

**Barry CS, McQuinn RP, Chung MY, Besuden A, Giovannoni JJ (2008) Amino acid substitutions in homologs of the STAY-GREEN protein are responsible for the green-flesh and chlorophyll retainer mutations of tomato and pepper. *Plant Physiol* 147: 179-187**

Pubmed: [Author and Title](#)

Google Scholar: [Author Only Title Only Author and Title](#)

**Bauchot AD, Mottram DS, Dodson AT, John P (1998) Effect of Aminocyclopropane-1-carboxylic Acid Oxidase Antisense Gene on the Formation of Volatile Esters in Cantaloupe Charentais Melon (Cv. Ve' drandais). *J Agric Food Chem* 46: 4787-4792**

Pubmed: [Author and Title](#)

Google Scholar: [Author Only Title Only Author and Title](#)

**Benjamini Y, Hochberg Y (1995) Controlling the false discovery rate: a practical and powerful approach to multiple testing. *Journal of the Royal statistical society: series B (Methodological)* 57: 289-300**

Pubmed: [Author and Title](#)

Google Scholar: [Author Only Title Only Author and Title](#)

**Bolger AM, Lohse M, Usadel B (2014) Trimmomatic: a flexible trimmer for Illumina sequence data. *Bioinformatics* 30: 2114-2120**

Pubmed: [Author and Title](#)

Google Scholar: [Author Only Title Only Author and Title](#)

**Bucher E, Kong J, Teyssier E, Gallusci P (2018) Epigenetic Regulations of Fleshy Fruit Development and Ripening and Their Potential Applications to Breeding Strategies. 88: 327-360**

Pubmed: [Author and Title](#)

Google Scholar: [Author Only Title Only Author and Title](#)

**Burger Y, Paris H, Cohen R, Katzir N, Tadmor Y, Lewinsohn E, Schaffer AA (2010) Genetic diversity of *Cucumis melo*. *Hortic Rev* 36: 165-198**

Pubmed: [Author and Title](#)

Google Scholar: [Author Only Title Only Author and Title](#)

**Corem S, Doron-Faigenboim A, Jouffroy O, Maumus F, Arazi T, Bouché N (2018) Redistribution of CHH Methylation and Small Interfering RNAs across the Genome of Tomato *ddm1* Mutants. *The Plant Cell* 30: 1628-1644**

Pubmed: [Author and Title](#)

Google Scholar: [Author Only Title Only Author and Title](#)

**De Pooter HL, Montens JP, Willaert GA, Dirinck PJ, Schamp NM (1983) Treatment of Golden Delicious apples with aldehydes and carboxylic acids: effect on the headspace composition. *Journal of Agricultural and Food Chemistry* 31: 813-818**

Pubmed: [Author and Title](#)

Google Scholar: [Author Only Title Only Author and Title](#)

**Diaz A, Forment J, Argyris JM, Fukino N, Tzuri G, Harel-Beja R, Katzir N, Garcia-Mas J, Monforte AJ (2015) Anchoring the consensus ICuGI genetic map to the melon (*Cucumis melo* L.) genome. *Molecular breeding* 35: 188**

Pubmed: [Author and Title](#)

Google Scholar: [Author Only Title Only Author and Title](#)

**El-Sharkawy I, Manriquez D, Flores FB, Regad F, Bouzayen M, Latche A, Pech JC (2005) Functional characterization of a melon alcohol acyl-transferase gene family involved in the biosynthesis of ester volatiles. Identification of the crucial role of a threonine residue for enzyme activity. *Plant Mol Biol* 59: 345-362**

Pubmed: [Author and Title](#)

Google Scholar: [Author Only Title Only Author and Title](#)

**El-Yahyaoui F, Wongs-Aree C, Latché A, Hackett R, Grierson D, Pech JC (2002) Molecular and biochemical characteristics of a gene encoding an alcohol acyl-transferase involved in the generation of aroma volatile esters during melon ripening. *Eur J Biochem* 269: 2359-2366**

Pubmed: [Author and Title](#)

Google Scholar: [Author Only Title Only Author and Title](#)

**Feder A, Burger J, Gao S, Lewinsohn E, Katzir N, Schaffer AA, Meir A, Davidovich-Rikanati R, Portnoy V, Gal-On A, Fei Z, Kashi Y,**

**Tadmor Y (2015) A Kelch Domain-Containing F-Box Coding Gene Negatively Regulates Flavonoid Accumulation in Muskmelon. *Plant Physiol* 169: 1714-1726**

Pubmed: [Author and Title](#)

Google Scholar: [Author Only](#) [Title Only](#) [Author and Title](#)

**Flores F, El-Yahyaoui F, de Billerbeck G, Romojaro F, Latché A, Bouzayen B, Pech JC, Ambid C (2002) Role of ethylene in the biosynthetic pathway of aliphatic ester aroma volatiles in Charentais Cantaloupe melons. *J Exp Bot* 53: 201-206**

Pubmed: [Author and Title](#)

Google Scholar: [Author Only](#) [Title Only](#) [Author and Title](#)

**Galpaz N, Gonda I, Shem-Tov D, Barad O, Tzuri G, Lev S, Fei Z, Xu Y, Mao L, Jiao C, Harel-Beja R, Doron-Faigenboim A, Tzfadia O, Bar E, Meir A, Sa'ar U, Fait A, Halperin E, Kenigswald M, Fallik E, Lombardi N, Kol G, Ronen G, Burger Y, Gur A, Tadmor Y, Portnoy V, Schaffer AA, Lewinsohn E, Giovannoni JJ, Katzir N (2018) Deciphering genetic factors that determine melon fruit-quality traits using RNA-Seq-based high-resolution QTL and eQTL mapping. *Plant J* 94: 169-191**

Pubmed: [Author and Title](#)

Google Scholar: [Author Only](#) [Title Only](#) [Author and Title](#)

**Giaever G, Chu AM, Ni L, Connelly C, Riles L, Véronneau S, Dow S, Lucau-Danila A, Anderson K, André B, Arkin AP, Astromoff A, El Bakkoury M, Bangham R, Benito R, Brachat S, Campanaro S, Curtiss M, Davis K, Deutschbauer A, Entian K-D, Flaherty P, Foury F, Garfinkel DJ, Gerstein M, Gotte D, Güldener U, Hegemann JH, Hempel S, Herman Z, Jaramillo DF, Kelly DE, Kelly SL, Kötter P, LaBonte D, Lamb DC, Lan N, Liang H, Liao H, Liu L, Luo C, Lussier M, Mao R, Menard P, Ooi SL, Revuelta JL, Roberts CJ, Rose M, Ross-Macdonald P, Scherens B, Schimmack G, Shafer B, Shoemaker DD, Sookhai-Mahadeo S, Storms RK, Strathern JN, Valle G, Voet M, Volckaert G, Wang C-y, Ward TR, Wilhelmy J, Winzeler EA, Yang Y, Yen G, Youngman E, Yu K, Bussey H, Boeke JD, Snyder M, Philippsen P, Davis RW, Johnston M (2002) Functional profiling of the *Saccharomyces cerevisiae* genome. *Nature* 418: 387-391**

Pubmed: [Author and Title](#)

Google Scholar: [Author Only](#) [Title Only](#) [Author and Title](#)

**Giovannoni J, Nguyen C, Ampofo B, Zhong S, Fei Z (2017) The epigenome and transcriptional dynamics of fruit ripening. *Annu Rev Plant Biol* 68: 61-84**

Pubmed: [Author and Title](#)

Google Scholar: [Author Only](#) [Title Only](#) [Author and Title](#)

**Giovannoni JJ (2004) Genetic regulation of fruit development and ripening. *Plant Cell* 16 Suppl: S170-180**

Pubmed: [Author and Title](#)

Google Scholar: [Author Only](#) [Title Only](#) [Author and Title](#)

**Gonda I, Bar E, Portnoy V, Lev S, Burger J, Schaffer AA, Tadmor Y, Gepstein S, Giovannoni JJ, Katzir N, Lewinsohn E (2010) Branched-chain and aromatic amino acid catabolism into aroma volatiles in *Cucumis melo* L. fruit. *J Exp Bot* 61: 1111-1123**

Pubmed: [Author and Title](#)

Google Scholar: [Author Only](#) [Title Only](#) [Author and Title](#)

**Gonda I, Burger Y, Schaffer AA, Ibdah M, Tadmor Y, Katzir N, Lewinsohn E (2016) Biosynthesis and perception of melon aroma. In D Havkin-Frenkel, N Dudai, eds, *Biotechnology in Flavor Production*, Ed 2. WILEY Blackwell, Chichester, West Sussex, UK, pp 281-305**

Pubmed: [Author and Title](#)

Google Scholar: [Author Only](#) [Title Only](#) [Author and Title](#)

**Gonda I, Davidovich-Rikanati R, Bar E, Lev S, Jhirad P, Meshulam Y, Wissotsky G, Portnoy V, Burger J, Schaffer AA, Tadmor Y, Giovannoni JJ, Fei Z, Fait A, Katzir N, Lewinsohn E (2018) Differential metabolism of L-phenylalanine in the formation of aromatic volatiles in melon (*Cucumis melo* L.) fruit. *Phytochemistry* 148: 122-131**

Pubmed: [Author and Title](#)

Google Scholar: [Author Only](#) [Title Only](#) [Author and Title](#)

**Gonda I, Lev S, Bar E, Sikron N, Portnoy V, Davidovich-Rikanati R, Burger J, Schaffer AA, Tadmor Y, Giovannoni JJ, Huang M, Fei Z, Katzir N, Fait A, Lewinsohn E (2013) Catabolism of L-methionine in the formation of sulfur and other volatiles in melon (*Cucumis melo* L.) fruit. *Plant J* 74: 458-472**

Pubmed: [Author and Title](#)

Google Scholar: [Author Only](#) [Title Only](#) [Author and Title](#)

**Goulao LF, Oliveira CM (2007) Molecular identification of novel differentially expressed mRNAs up-regulated during ripening of apples. *Plant Science* 172: 306-318**

Pubmed: [Author and Title](#)

Google Scholar: [Author Only](#) [Title Only](#) [Author and Title](#)

**Groth M, Moissiard G, Wirtz M, Wang H, Garcia-Salinas C, Ramos-Parra PA, Bischof S, Feng S, Cokus SJ, John A, Smith DC, Zhai J, Hale CJ, Long JA, Hell R, Diaz de la Garza RI, Jacobsen SE (2016) MTHFD1 controls DNA methylation in *Arabidopsis*. *Nat Commun* 7: 11640**

Pubmed: [Author and Title](#)

Google Scholar: [Author Only](#) [Title Only](#) [Author and Title](#)

**Gur A, Tzuri G, Meir A, Sa'ar U, Portnoy V, Katzir N, Schaffer AA, Li L, Burger J, Tadmor Y (2017) Genome-Wide Linkage-Disequilibrium Mapping to the Candidate Gene Level in Melon (*Cucumis melo*). *Sci Rep* 7: 9770**

Pubmed: [Author and Title](#)

Google Scholar: [Author Only](#) [Title Only](#) [Author and Title](#)

**Holec S, Berger F (2012) Polycomb group complexes mediate developmental transitions in plants. Plant Physiol 158: 35-43**

Pubmed: [Author and Title](#)

Google Scholar: [Author Only Title Only Author and Title](#)

**Homatidou VI, Karvouni SS, Dourtoglou VG, Poulos CN (1992) Determination of total volatile components of Cucumis melo L. variety cantaloupensis. J Agric Food Chem 40: 1385-1388**

Pubmed: [Author and Title](#)

Google Scholar: [Author Only Title Only Author and Title](#)

**How Kit A, Boureau L, Stammitti-Bert L, Rolin D, Teyssier E, Gallusci P (2010) Functional analysis of SIEZ1 a tomato enhancer of zeste (E(z)) gene demonstrates a role in flower development. Plant Mol Biol 74: 201-213**

Pubmed: [Author and Title](#)

Google Scholar: [Author Only Title Only Author and Title](#)

**Hsieh TF, Ibarra CA, Silva P, Zemach A, Eshed-Williams L, Fischer RL, Zilberman D (2009) Genome-wide demethylation of Arabidopsis endosperm. Science 324: 1451-1454**

Pubmed: [Author and Title](#)

Google Scholar: [Author Only Title Only Author and Title](#)

**Jander G, Norris SR, Joshi V, Fraga M, Rugg A, Yu S, Li L, Last RL (2004) Application of a high-throughput HPLC-MS/MS assay to Arabidopsis mutant screening; evidence that threonine aldolase plays a role in seed nutritional quality. The Plant Journal 39: 465-475**

Pubmed: [Author and Title](#)

Google Scholar: [Author Only Title Only Author and Title](#)

**Jin Y, Zhang C, Liu W, Tang Y, Qi H, Chen H, Cao S (2016) The Alcohol Dehydrogenase Gene Family in Melon (Cucumis melo L.): Bioinformatic Analysis and Expression Patterns. Front Plant Sci 7: 670**

Pubmed: [Author and Title](#)

Google Scholar: [Author Only Title Only Author and Title](#)

**Kim D, Langmead B, Salzberg SL (2015) HISAT: a fast spliced aligner with low memory requirements. Nature Methods 12: 357**

Pubmed: [Author and Title](#)

Google Scholar: [Author Only Title Only Author and Title](#)

**Lang Z, Wang Y, Tang K, Tang D, Datsenko T, Cheng J, Zhang Y, Handa AK, Zhu JK (2017) Critical roles of DNA demethylation in the activation of ripening-induced genes and inhibition of ripening-repressed genes in tomato fruit. Proc Natl Acad Sci U S A 114: E4511-E4519**

Pubmed: [Author and Title](#)

Google Scholar: [Author Only Title Only Author and Title](#)

**Langmead B (2010) Aligning short sequencing reads with Bowtie. Current protocols in bioinformatics 32: 11.17. 11-11.17. 14**

Pubmed: [Author and Title](#)

Google Scholar: [Author Only Title Only Author and Title](#)

**Liu DD, Dong QL, Fang MJ, Chen KQ, Hao YJ (2012) Ectopic expression of an apple apomixis-related gene MhFIE induces co-suppression and results in abnormal vegetative and reproductive development in tomato. J Plant Physiol 169: 1866-1873**

Pubmed: [Author and Title](#)

Google Scholar: [Author Only Title Only Author and Title](#)

**Liu DD, Zhou LJ, Fang MJ, Dong QL, An XH, You CX, Hao YJ (2016) Polycomb-group protein SIMS1 represses the expression of fruit-ripening genes to prolong shelf life in tomato. Sci Rep 6: 31806**

Pubmed: [Author and Title](#)

Google Scholar: [Author Only Title Only Author and Title](#)

**Liu J-Q, Nagata S, Dairi T, Misono H, Shimizu S, Yamada H (1997) The GLY1 Gene of Saccharomyces Cerevisiae Encodes a Low-Specific L-threonine Aldolase that Catalyzes Cleavage of L-allo-Threonine and L-threonine to Glycine. European Journal of Biochemistry 245: 289-293**

Pubmed: [Author and Title](#)

Google Scholar: [Author Only Title Only Author and Title](#)

**Liu R, How-Kit A, Stammitti L, Teyssier E, Rolin D, Mortain-Bertrand A, Halle S, Liu M, Kong J, Wu C, Degraeve-Guibault C, Chapman NH, Maucourt M, Hodgman TC, Tost J, Bouzayen M, Hong Y, Seymour GB, Giovannoni JJ, Gallusci P (2015) A DEMETER-like DNA demethylase governs tomato fruit ripening. Proc Natl Acad Sci U S A 112: 10804-10809**

Pubmed: [Author and Title](#)

Google Scholar: [Author Only Title Only Author and Title](#)

**Love MI, Huber W, Anders S (2014) Moderated estimation of fold change and dispersion for RNA-seq data with DESeq2. Genome Biology 15: 550**

Pubmed: [Author and Title](#)

Google Scholar: [Author Only Title Only Author and Title](#)

**Lu P, Yu S, Zhu N, Chen YR, Zhou B, Pan Y, Tzeng D, Fabi JP, Argyris J, Garcia-Mas J, Ye N, Zhang J, Grierson D, Xiang J, Fei Z, Giovannoni J, Zhong S (2018) Genome encode analyses reveal the basis of convergent evolution of fleshy fruit ripening. Nat Plants 4: 784-791**

Pubmed: [Author and Title](#)

Google Scholar: [Author Only Title Only Author and Title](#)

**Manríquez D, El-Sharkawy I, Flores FB, El-Yahyaoui F, Regad F, Bouzayen M, Latche A, Pech JC (2006) Two highly divergent alcohol dehydrogenases of melon exhibit fruit ripening-specific expression and distinct biochemical characteristics. *Plant Mol Biol* 61: 675-685**

Pubmed: [Author and Title](#)

Google Scholar: [Author Only Title Only Author and Title](#)

**Meng J, Wang L, Wang J, Zhao X, Cheng J, Yu W, Jin D, Li Q, Gong Z (2018) METHIONINE ADENOSYLTRANSFERASE4 Mediates DNA and Histone Methylation. *Plant Physiology* 177: 652-670**

Pubmed: [Author and Title](#)

Google Scholar: [Author Only Title Only Author and Title](#)

**Obando-Ulloa JM, Moreno E, Garcia-Mas J, Nicolai B, Lammertyn J, Monforte AJ, Fernández-Trujillo JP (2008) Climacteric or non-climacteric behavior in melon fruit - 1. Aroma volatiles. *Postharvest Biol Technol* 49: 27-37**

Pubmed: [Author and Title](#)

Google Scholar: [Author Only Title Only Author and Title](#)

**Pech JC, Bouzayen M, Latché A (2008) Climacteric fruit ripening: Ethylene-dependent and independent regulation of ripening pathways in melon fruit. *Plant Science* 175: 114-120**

Pubmed: [Author and Title](#)

Google Scholar: [Author Only Title Only Author and Title](#)

**Pesis E, Avissar L (1990) Effect of postharvest application of acetaldehyde vapour on strawberry decay, taste and certain volatiles. *Journal of the Science of Food and Agriculture* 52: 377-385**

Pubmed: [Author and Title](#)

Google Scholar: [Author Only Title Only Author and Title](#)

**Pesis E, Zauberman G, Avissar I (1991) Induction of Certain Aroma Volatiles in Feijoa Fruit by Postharvest Application of Acetaldehyde or Anaerobic Conditions. *J Sci Food Agric* 54: 329-337**

Pubmed: [Author and Title](#)

Google Scholar: [Author Only Title Only Author and Title](#)

**Rios P, Argyris J, Vegas J, Leida C, Kenigswald M, Tzuri G, Troadec C, Bendahmane A, Katzir N, Pico B, Monforte AJ, Garcia-Mas J (2017) ETHQV6.3 is involved in melon climacteric fruit ripening and is encoded by a NAC domain transcription factor. *Plant J* 91: 671-683**

Pubmed: [Author and Title](#)

Google Scholar: [Author Only Title Only Author and Title](#)

**Rocha PS, Sheikh M, Melchiorre R, Fagard M, Boutet S, Loach R, Moffatt B, Wagner C, Vaucheret H, Furner I (2005) The Arabidopsis HOMOLOGY-DEPENDENT GENE SILENCING1 gene codes for an S-adenosyl-L-homocysteine hydrolase required for DNA methylation-dependent gene silencing. *Plant Cell* 17: 404-417**

Pubmed: [Author and Title](#)

Google Scholar: [Author Only Title Only Author and Title](#)

**Saladié M, Cañizares J, Phillips MA, Rodriguez-Concepcion M, Larrigaudière C, Gibon Y, Stitt M, Lunn JE, Garcia-Mas J (2015) Comparative transcriptional profiling analysis of developing melon (*Cucumis melo* L.) fruit from climacteric and non-climacteric varieties. *BMC Genomics* 16**

Pubmed: [Author and Title](#)

Google Scholar: [Author Only Title Only Author and Title](#)

**Shalit M, Katzir N, Tadmor Y, Larkov O, Burger J, Shalekhet F, Lastochkin E, Ravid U, Amar O, Edelstein M, Karchi Z, Lewinsohn E (2001) Acetyl-CoA: Alcohol Acetyltransferase Activity and Aroma Formation in Ripening Melon Fruits. *J Agric Food Chem* 49: 794-799**

Pubmed: [Author and Title](#)

Google Scholar: [Author Only Title Only Author and Title](#)

**Shimoda Y, Ito H, Tanaka A (2016) Arabidopsis STAY-GREEN, Mendel's Green Cotyledon Gene, Encodes Magnesium-Dechelataase. *Plant Cell* 28: 2147-2160**

Pubmed: [Author and Title](#)

Google Scholar: [Author Only Title Only Author and Title](#)

**Shin AY, Kim YM, Koo N, Lee SM, Nahm S, Kwon SY (2017) Transcriptome analysis of the oriental melon (*Cucumis melo* L. var. *maukuwa*) during fruit development. *PeerJ* 5: e2834**

Pubmed: [Author and Title](#)

Google Scholar: [Author Only Title Only Author and Title](#)

**Stroud H, Otero S, Desvoyes B, Ramírez-Parra E, Jacobsen SE, Gutierrez C (2012) Genome-wide analysis of histone H3.1 and H3.3 variants in Arabidopsis thaliana. *Proc Natl Acad Sci U S A* 109: 5370-5375**

Pubmed: [Author and Title](#)

Google Scholar: [Author Only Title Only Author and Title](#)

**Tieman D, Zhu G, Resende MFR, Lin T, Nguyen C, Bies D, Rambla JL, Beltran KSO, Taylor M, Zhang B, Ikeda H, Liu Z, Fisher J, Zemach I, Monforte A, Zamir D, Granell A, Kirst M, Huang S, Klee H (2017) A chemical genetic roadmap to improved tomato flavor. *Science* 355: 391-394**

Pubmed: [Author and Title](#)

Google Scholar: [Author Only Title Only Author and Title](#)

**Tietel Z, Feldmesser E, Lewinsohn E, Fallik E, Porat R (2011) Changes in the transcriptome of 'Mor' mandarin flesh during storage: emphasis on molecular regulation of fruit flavor deterioration. J Agric Food Chem 59: 3819-3827**

Pubmed: [Author and Title](#)

Google Scholar: [Author Only](#) [Title Only](#) [Author and Title](#)

**Tzuri G, Zhou X, Chayut N, Yuan H, Portnoy V, Meir A, Sa'ar U, Baumkoler F, Mazourek M, Lewinsohn E, Fei Z, Schaffer AA, Li L, Burger J, Katzir N, Tadmor Y (2015) A 'golden' SNP in CmOr governs the fruit flesh color of melon (Cucumis melo). Plant J 82: 267-279**

Pubmed: [Author and Title](#)

Google Scholar: [Author Only](#) [Title Only](#) [Author and Title](#)

**Wang M, Zhang L, Boo KH, Park E, Drakakaki G, Zakharov F (2019) PDC1, a pyruvate/alpha-ketoacid decarboxylase, is involved in acetaldehyde, propanal and pentanal biosynthesis in melon (Cucumis melo L.) fruit. Plant J 98: 112-125**

Pubmed: [Author and Title](#)

Google Scholar: [Author Only](#) [Title Only](#) [Author and Title](#)

**Wyllie SG, Leach DN, Wang Y, Shewfelt RL (1995) Key Aroma Compounds in Melons: Their Development and Cultivar Dependence. In RL Rouseff, MM Leahy, eds, Fruit Flavors: Biogenesis, Characterization, and Authentication. American Chemical Society, Washington, D.C., pp 248-257**

Pubmed: [Author and Title](#)

Google Scholar: [Author Only](#) [Title Only](#) [Author and Title](#)

**Yan X, Ma L, Pang H, Wang P, Liu L, Cheng Y, Cheng J, Guo Y, Li Q (2019) METHIONINE SYNTHASE1 Is Involved in Chromatin Silencing by Maintaining DNA and Histone Methylation. Plant Physiol 181: 249-261**

Pubmed: [Author and Title](#)

Google Scholar: [Author Only](#) [Title Only](#) [Author and Title](#)

**Yano R, Ezura H (2016) Fruit Ripening in Melon. In R Grumet, N Katzir, J Garcia-Mas, eds, Genetics and genomics of the cucurbitaceae. Springer Intl Pub AG, New York, pp 345-375**

Pubmed: [Author and Title](#)

Google Scholar: [Author Only](#) [Title Only](#) [Author and Title](#)

**Yano R, Nonaka S, Ezura H (2018) Melonet-DB, a Grand RNA-Seq Gene Expression Atlas in Melon (Cucumis melo L.). Plant Cell Physiol 59: e4**

Pubmed: [Author and Title](#)

Google Scholar: [Author Only](#) [Title Only](#) [Author and Title](#)

**Yazdani M, Sun Z, Yuan H, Zeng S, Thannhauser TW, Vrebalov J, Ma Q, Xu Y, Fei Z, Van Eck J, Tian S, Tadmor Y, Giovannoni JJ, Li L (2019) Ectopic expression of ORANGE promotes carotenoid accumulation and fruit development in tomato. Plant Biotechnol J 17: 33-49**

Pubmed: [Author and Title](#)

Google Scholar: [Author Only](#) [Title Only](#) [Author and Title](#)

**Yuan H, Owsiany K, Sheeja TE, Zhou X, Rodriguez C, Li Y, Welsch R, Chayut N, Yang Y, Thannhauser TW, Parthasarathy MV, Xu Q, Deng X, Fei Z, Schaffer A, Katzir N, Burger J, Tadmor Y, Li L (2015) A Single Amino Acid Substitution in an ORANGE Protein Promotes Carotenoid Overaccumulation in Arabidopsis. Plant Physiol 169: 421-431**

Pubmed: [Author and Title](#)

Google Scholar: [Author Only](#) [Title Only](#) [Author and Title](#)

**Zemach A, Kim MY, Silva P, Rodrigues JA, Dotson B, Brooks MD, Zilberman D (2010) Local DNA hypomethylation activates genes in rice endosperm. Proc Natl Acad Sci U S A 107: 18729-18734**

Pubmed: [Author and Title](#)

Google Scholar: [Author Only](#) [Title Only](#) [Author and Title](#)

**Zhang X, Yazaki J, Sundaresan A, Cokus S, Chan SW, Chen H, Henderson IR, Shinn P, Pellegrini M, Jacobsen SE, Ecker JR (2006) Genome-wide high-resolution mapping and functional analysis of DNA methylation in Arabidopsis. Cell 126: 1189-1201**

Pubmed: [Author and Title](#)

Google Scholar: [Author Only](#) [Title Only](#) [Author and Title](#)

**Zhong S, Fei Z, Chen YR, Zheng Y, Huang M, Vrebalov J, McQuinn R, Gapper N, Liu B, Xiang J, Shao Y, Giovannoni JJ (2013) Single-base resolution methylomes of tomato fruit development reveal epigenome modifications associated with ripening. Nat Biotechnol 31: 154-159**

Pubmed: [Author and Title](#)

Google Scholar: [Author Only](#) [Title Only](#) [Author and Title](#)

**Zhong S, Joung J-G, Zheng Y, Chen Y-r, Liu B, Shao Y, Xiang JZ, Fei Z, Giovannoni JJ (2011) High-Throughput Illumina Strand-Specific RNA Sequencing Library Preparation. Cold Spring Harbor Protocols 2011: pdb.prot5652**

Pubmed: [Author and Title](#)

Google Scholar: [Author Only](#) [Title Only](#) [Author and Title](#)

**Zhou S, Liu X, Zhou C, Zhou Q, Zhao Y, Li G, Zhou DX (2016) Cooperation between the H3K27me3 Chromatin Mark and Non-CG Methylation in Epigenetic Regulation. Plant Physiol 172: 1131-1141**

Pubmed: [Author and Title](#)

Google Scholar: [Author Only](#) [Title Only](#) [Author and Title](#)
